# Supplementary material for: Combined Approach of Cyclodextrin Complexationand Nanostructured Lipid Carriers for the Development of a Pediatric Liquid Oral Dosage Form of Hydrochlorothiazide
Source: PubMed Central journal article supplement (PMC6321408; doi:10.3390/pharmaceutics10040287), 2018-12-19
Supplement: pharmaceutics-10-00287-s001.pdf [file pharmaceutics-10-00287-s001.pdf]

# Supplementary Materials: Combined Approach of Cyclodextrin Complexation and Nanostructured Lipid Carriers for the Development of a Pediatric Liquid Oral Dosage Form of Hydrochlorothiazide

Marzia Cirri, Francesca Maestrelli, Paola Mura, Carla Ghelardini and Lorenzo Di Cesare Mannelli

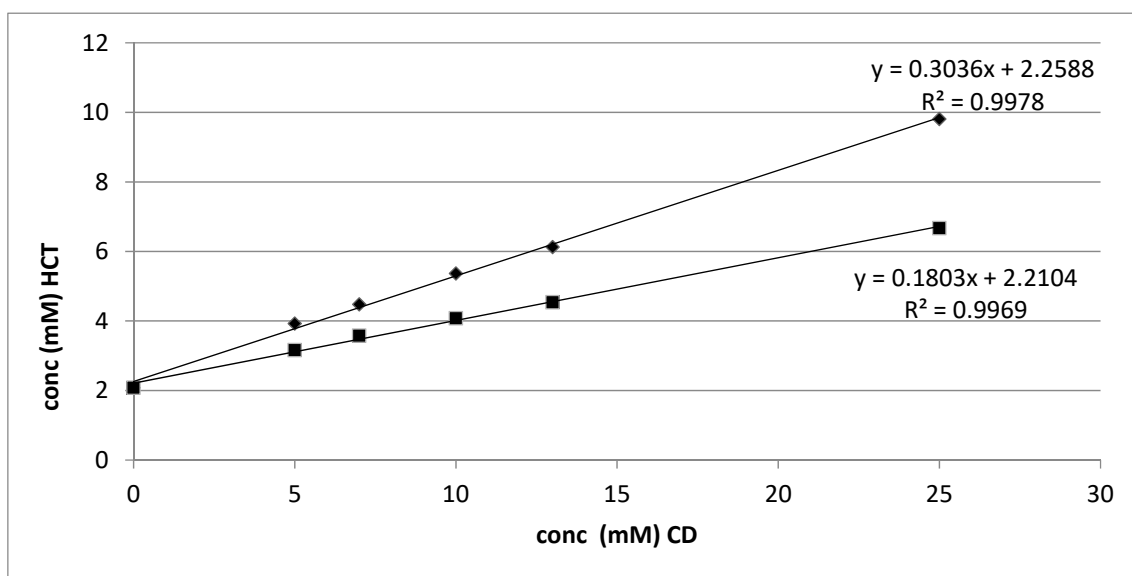

Figure S1. Phase solubility studies of HCT with SBEβCD (◆) and with HPβCD (■).
